# Supplementary material for: A Bacillus licheniformis Glycoside Hydrolase 43 Protein Is Recognized as a MAMP
Source: MDPI journal article supplement (doi:10.3390/ijms232214435), 2022-11-20
Supplement: s1 [file s1]

## Supplementary Figures

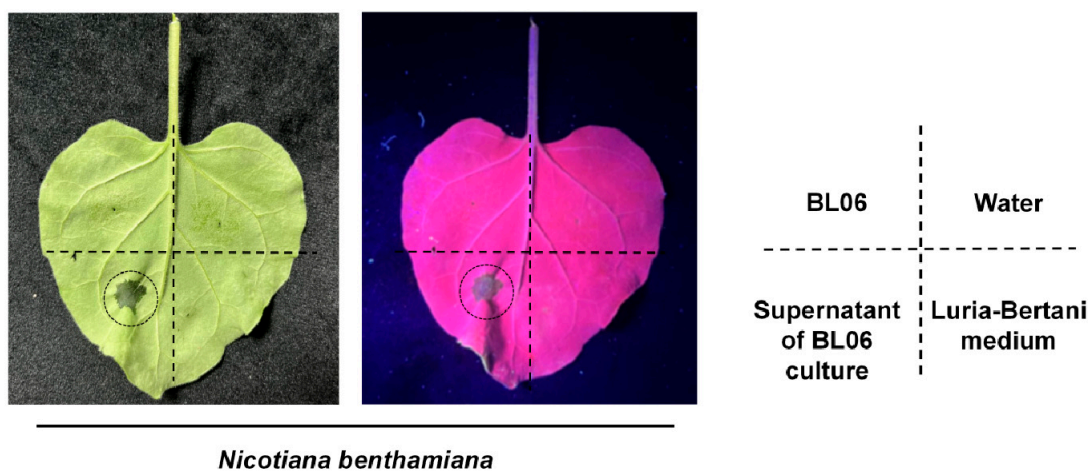

Figure S1. Supernatant of *Bacillus licheniformis* (BL06) fermentation broth can induce HR response in *Nicotiana benthamiana* leaves.

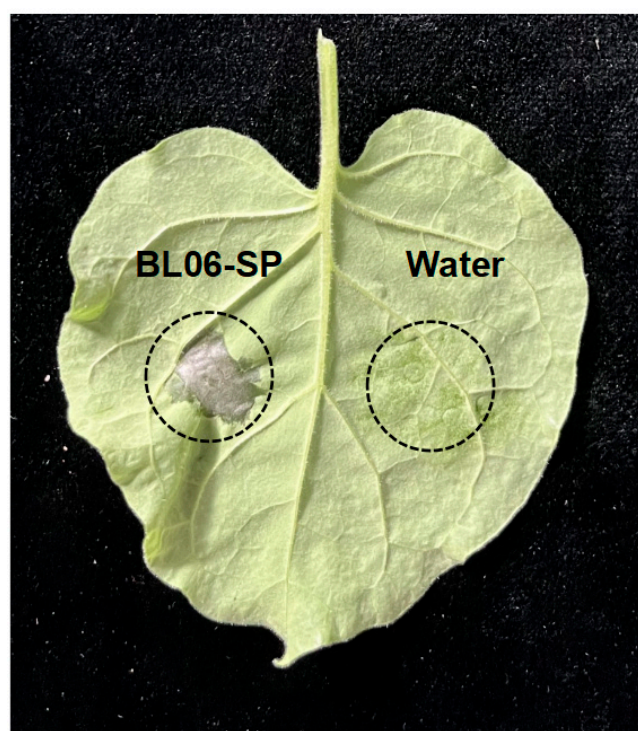

Figure S2. Crude protein of *B. licheniformis* (BL06) can induce HR response in *N. benthamiana* leaves.

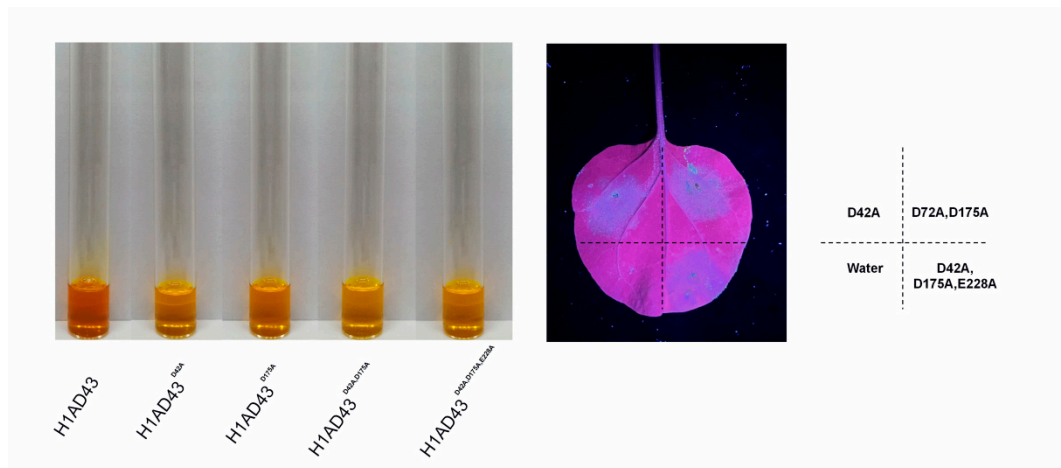

Figure S3. Determination of recombinant H1AD43 enzyme activity and its active site mutation.

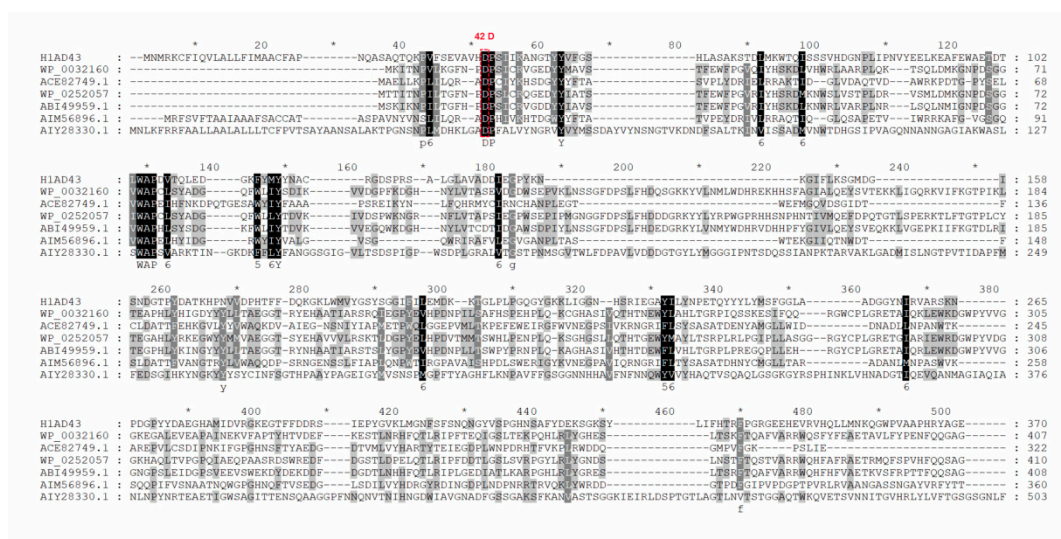

Figure S4. Amino acid sequence alignment of H1AD43 with members of the glycoside hydrolase 43 family.
